# Supplementary material for: Beneficial Effects of Tacrolimus on Brain-Death-Associated Right Ventricular Dysfunction in Pigs
Source: MDPI journal article supplement (doi:10.3390/ijms241310439), 2023-06-21
Supplement: s1 [file s1]

## Supplemental Data

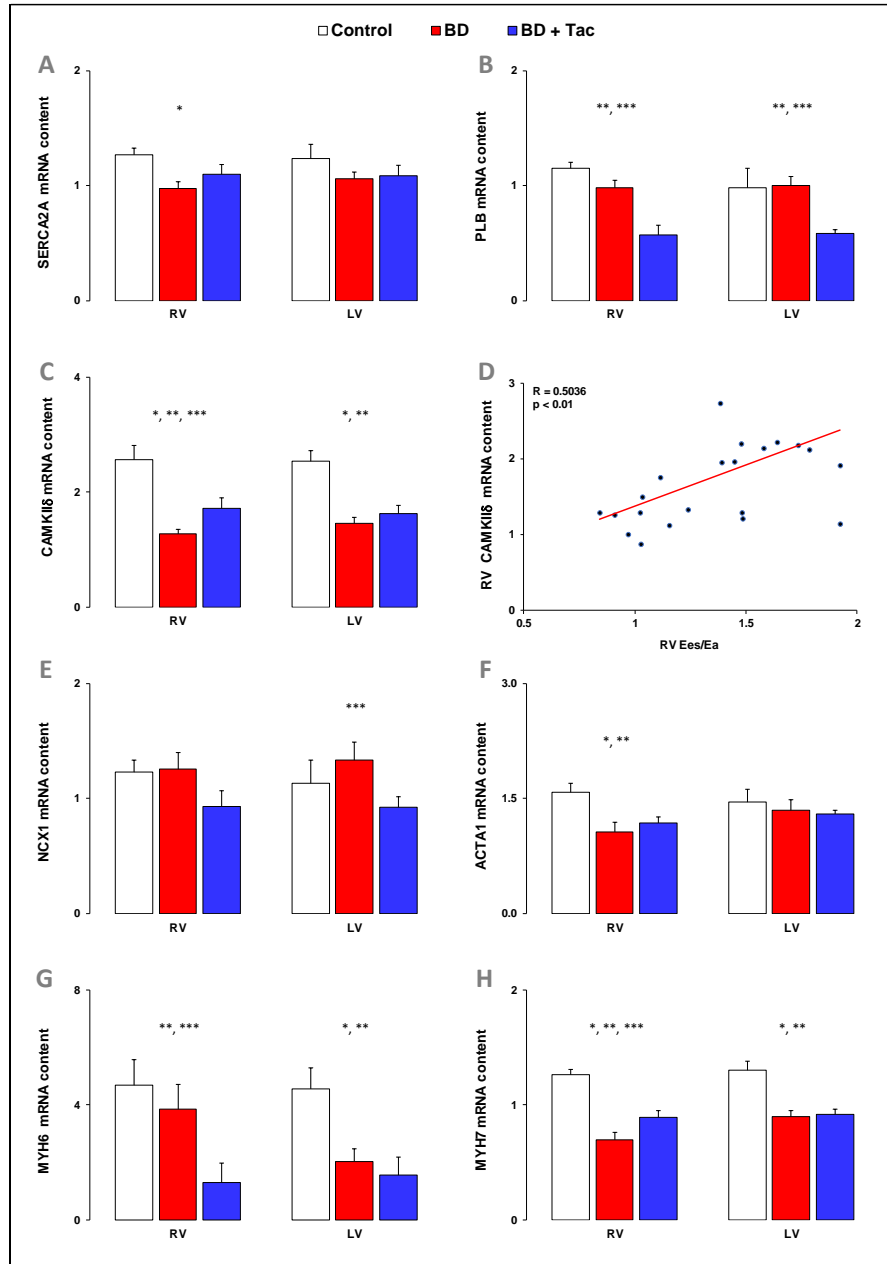

**Figure S1.** Myocardial expression in brain death-induced right ventricular dysfunction with/without tacrolimus pretreatment. ATPase sarcoplasmic/endoplasmic reticulum  $\text{Ca}^{2+}$  transporting 2 (SERCA2A) (A), Phospholamban (PLB) (B),  $\text{Ca}^{2+}$ /calmodulin-dependent protein kinase II delta (CAMKII  $\delta$ ) (C), Sodium/calcium exchanger protein (NCX1) (E), Actin alpha 1 (ACTA1) (F), Myosin heavy chain -(MYH) 6 (G) and 7 (H) relative mRNA content in the right (RV) and left ventricles (LV) from the control (n=7; white bars), placebo (brain death, BD; n=9; red bars), and tacrolimus pretreated brain death (BD+Tac; n=8; blue bars) groups 7-hours after the Cushing reflex (CR+7 hours). Values are expressed as mean  $\pm$  standard error of the mean. \*  $p < 0.05$  Control vs. BD, \*\*  $p < 0.05$  Control vs. BD+Tac, \*\*\*  $p < 0.05$  BD vs. BD+Tac.

Correlations between the Ees/Ea ratio and genic expression for (D) in the RV.
